# Supplementary material
Source: PubMed Central journal article supplement (PMC5556867)
Supplement: JCOPDF-1-229-s001.pdf [file JCOPDF-1-229-s001.pdf]

# e-Figure 1. Graphic Plots Comparing Demographic, Anthropometric, and Physiologic Variables in the 5 BMI Groups.

BMI categories are denoted as (1) for BMI  $\leq 21$  kg/m<sup>2</sup>, (2) for BMI  $>21$  and  $<25$  kg/m<sup>2</sup>, (3) for BMI  $\geq 25$  and  $<30$  kg/m<sup>2</sup>, (4) for BMI  $\geq 30$  and  $<35$  kg/m<sup>2</sup> and (5) for BMI  $\geq 35$  kg/m<sup>2</sup>.

## A. Age Distribution

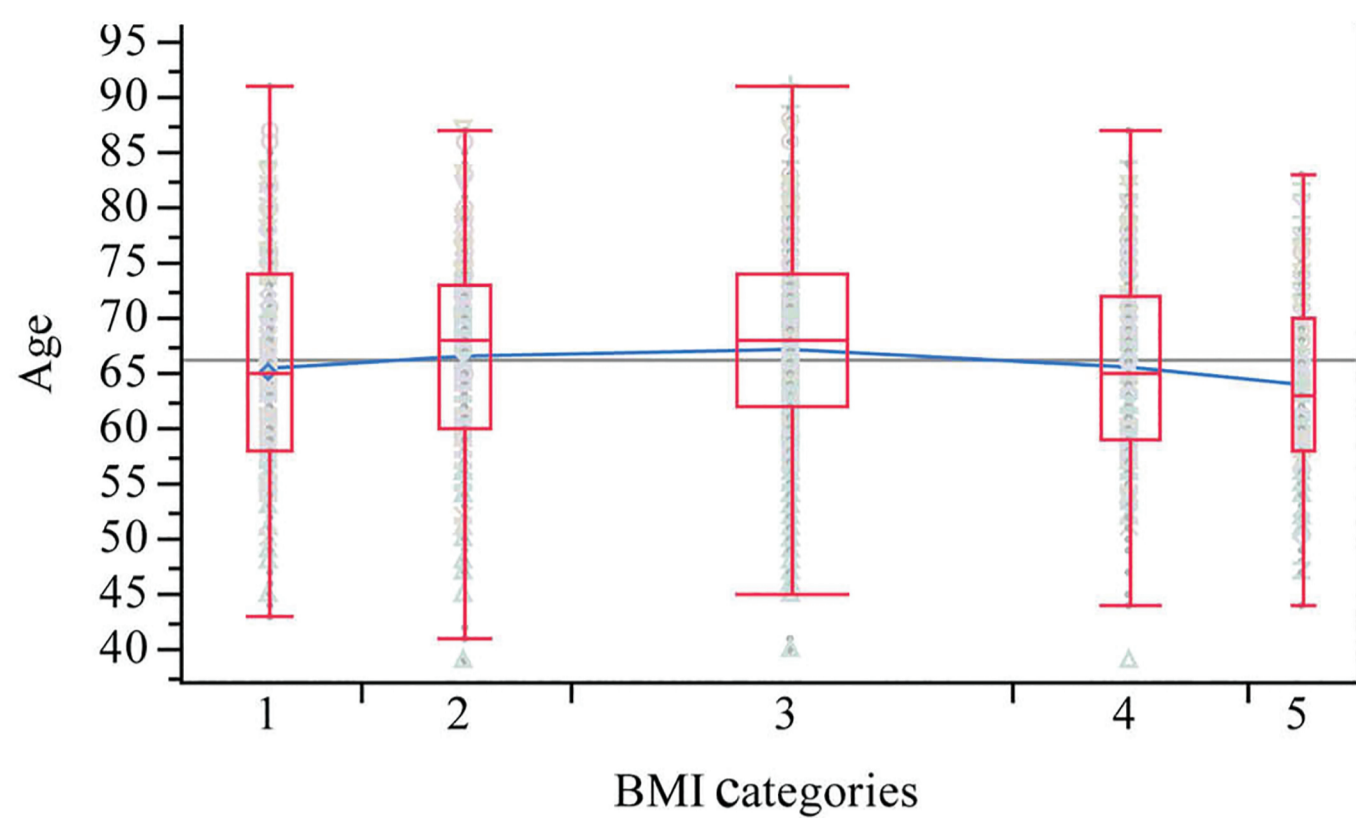

## B. St. George's Respiratory Questionnaire (total score)

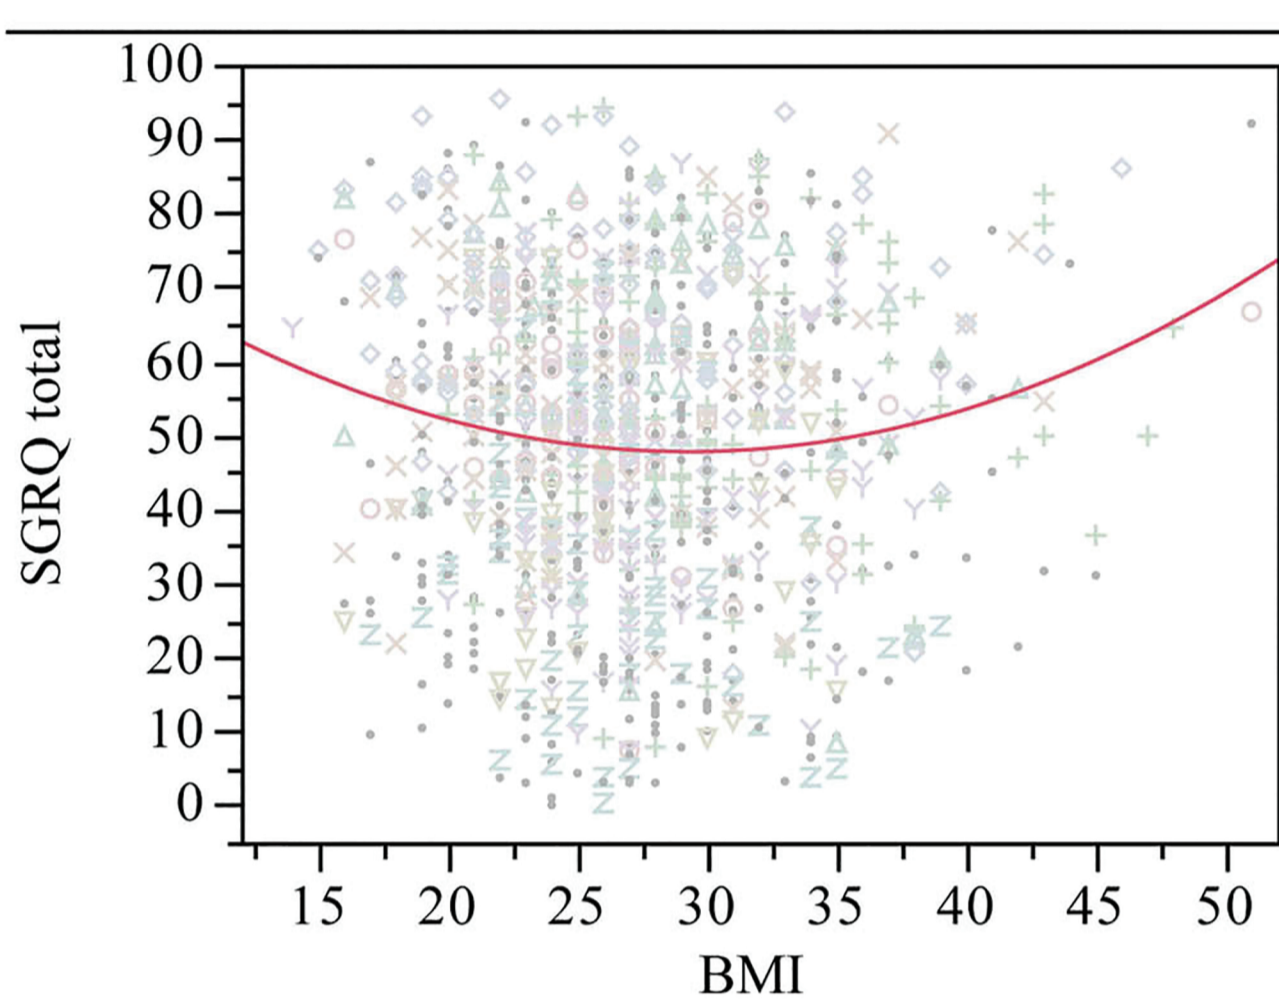

## C. FEV<sub>1</sub> % Predicted

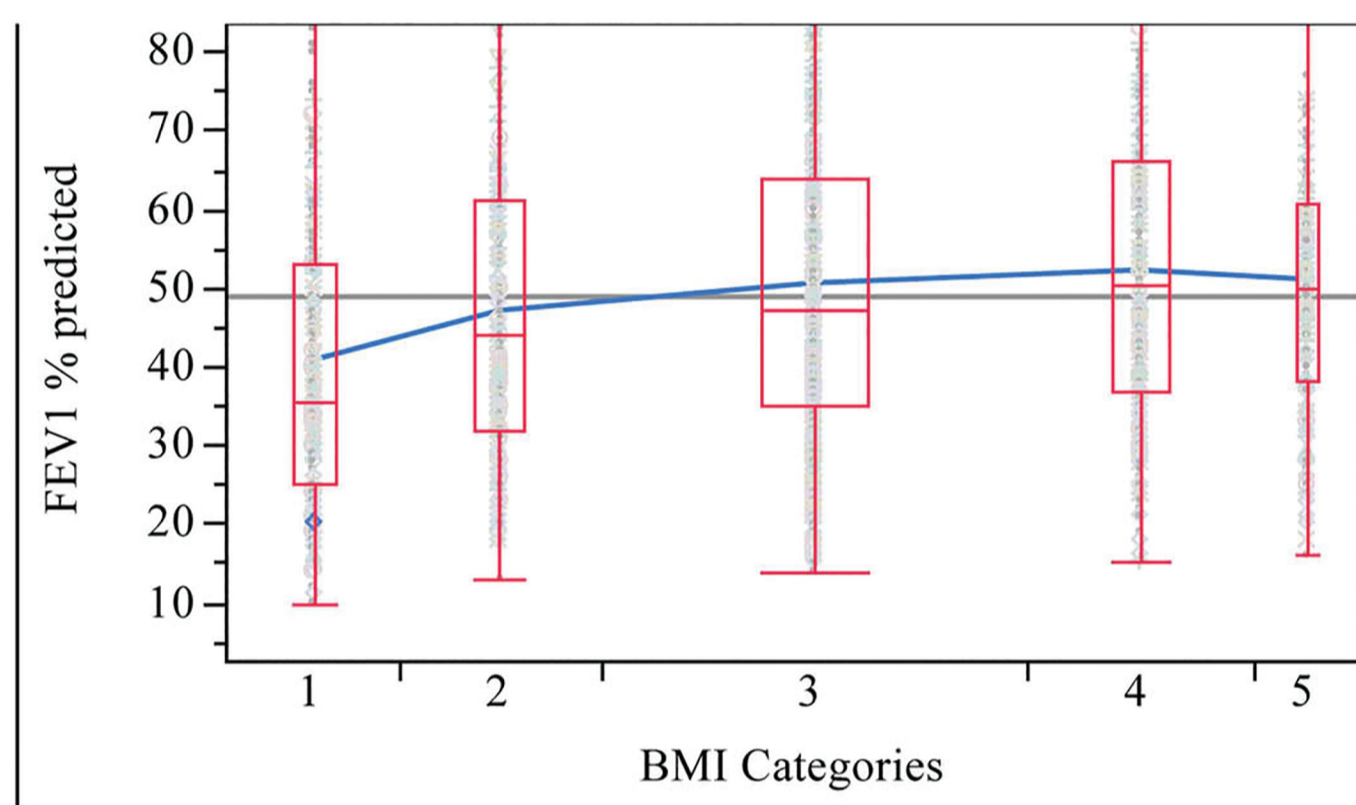

## D. mMRC Dyspnea Score

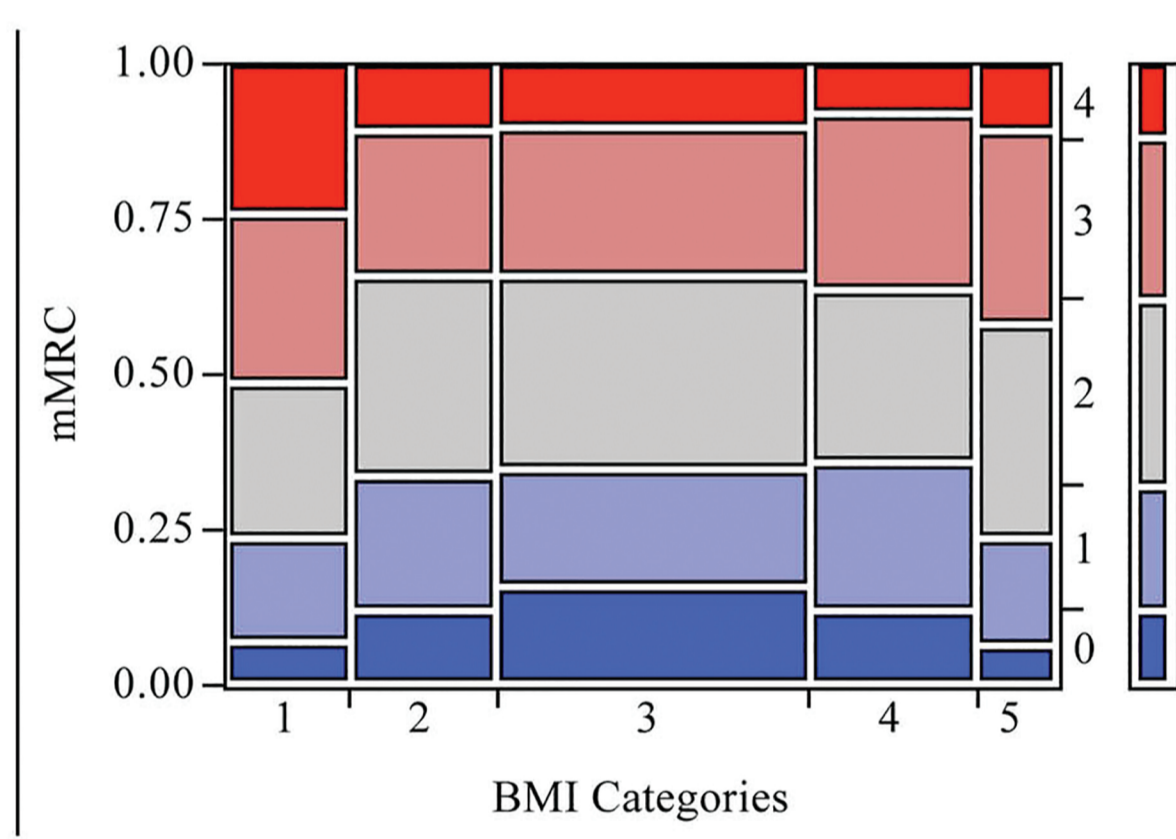

## E. 6-Minute Walk Test

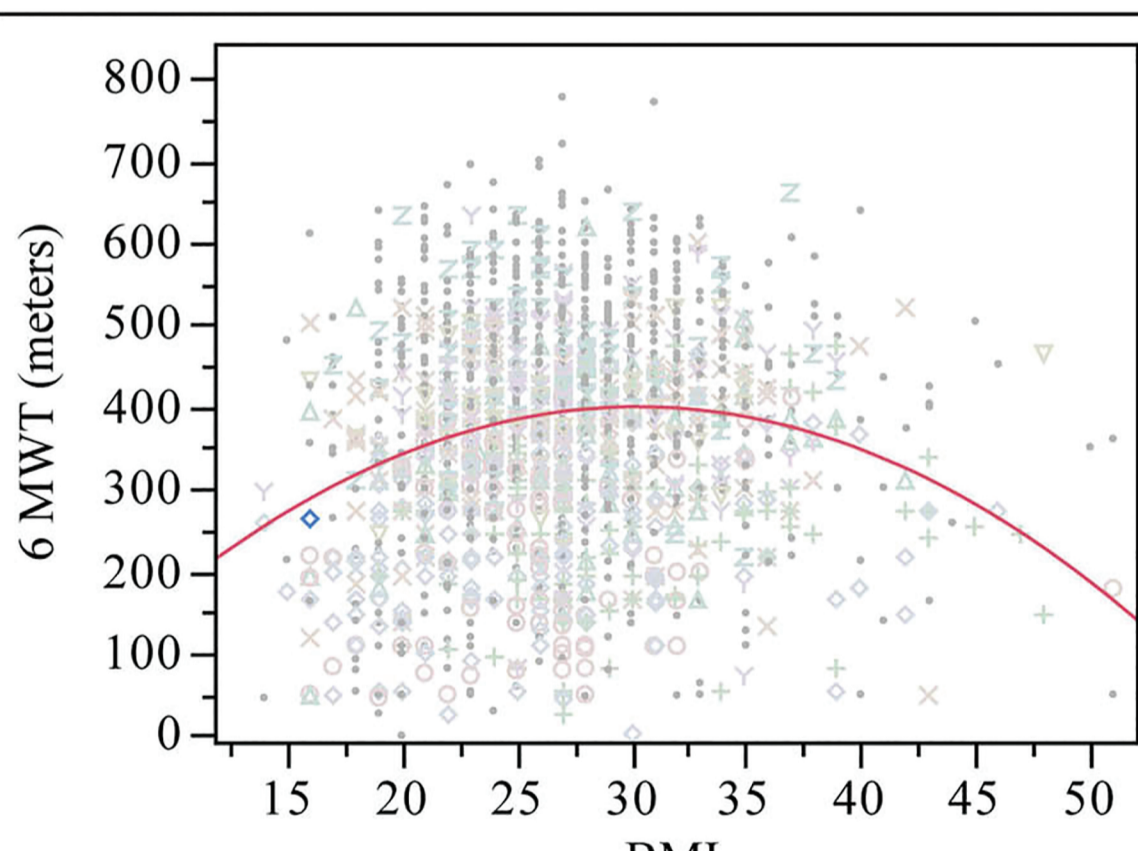

## E. BODE Score

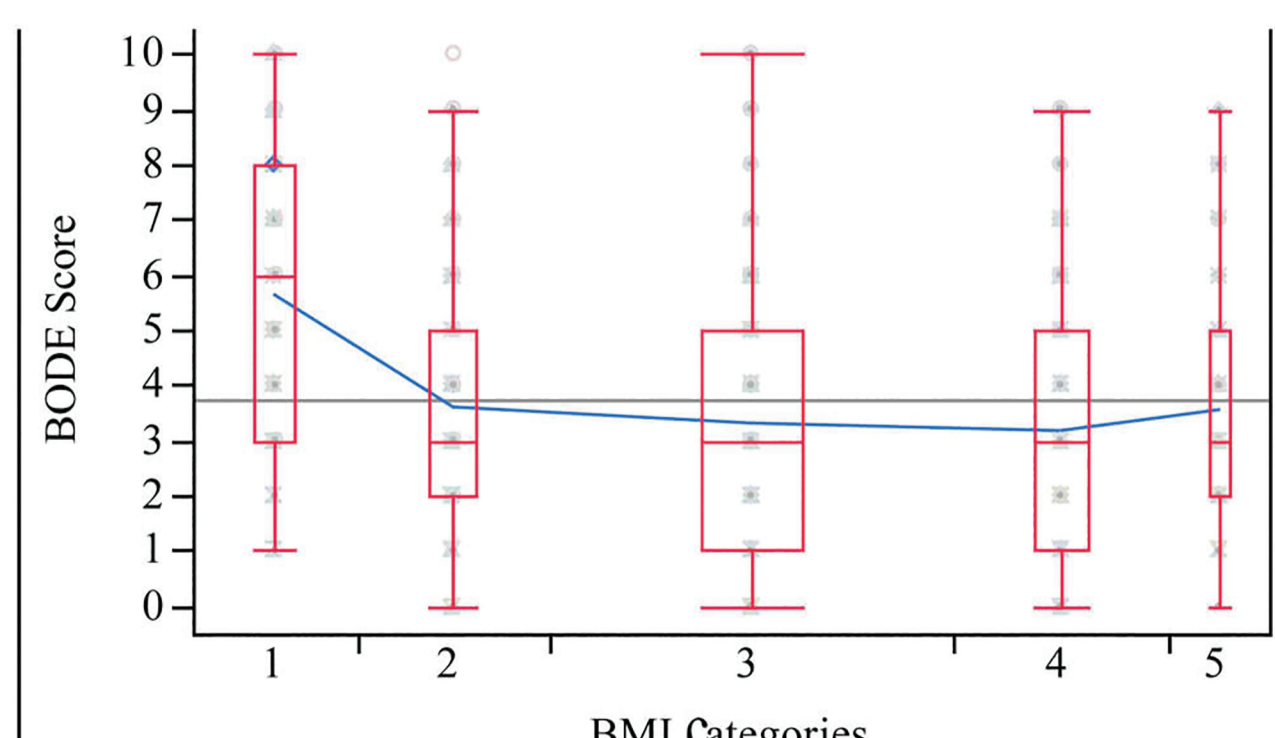

# e-Figure 2. Kaplan-Meier Curve Comparing Survival Probability Between BMI Categories.

## Kaplan-Meier Survival Curve

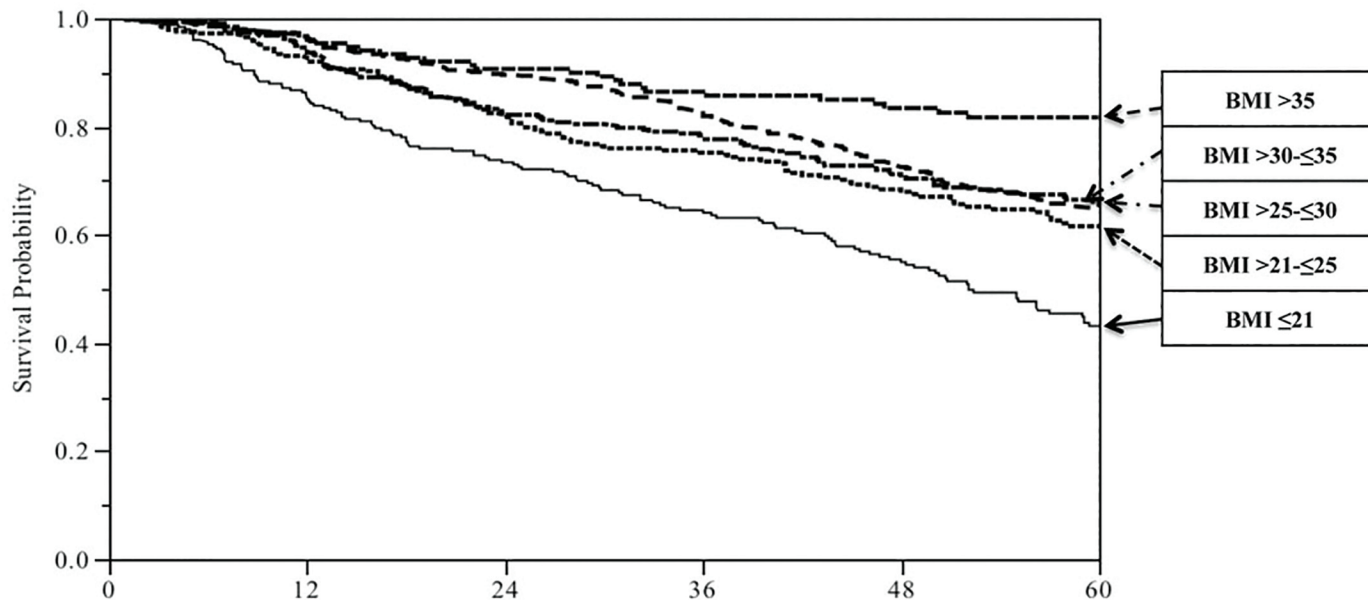

| Group                          | Median Time | Lower 95% | Upper 95% | 25% Failures | 75% Failures |
|--------------------------------|-------------|-----------|-----------|--------------|--------------|
| BMI ≤21                        | 52.1        | 46.1      | 59.4      | 22.1         | 95.5         |
| BMI >21-≤25                    | 86          | 69.1      | 100.2     | 37.1         |              |
| BMI >25-≤30                    | 106         | 97.3      | -         | 45.3         | 147          |
| BMI >30-≤35                    | 119.9       | 85.4      | -         | 42           |              |
| BMI >35                        | 114         | 103.3     | -         | 64.5         |              |
| Combined                       | 93.5        | 83.4      | 104       | 40.9         | 147          |
| Wilcoxon Log Rank test= <.0001 |             |           |           |              |              |

**e-Figure 3. Bar Charts Showing Absolute Number of Death per Category (n), and Proportions for Specific Cause of Death by BMI Categories.**

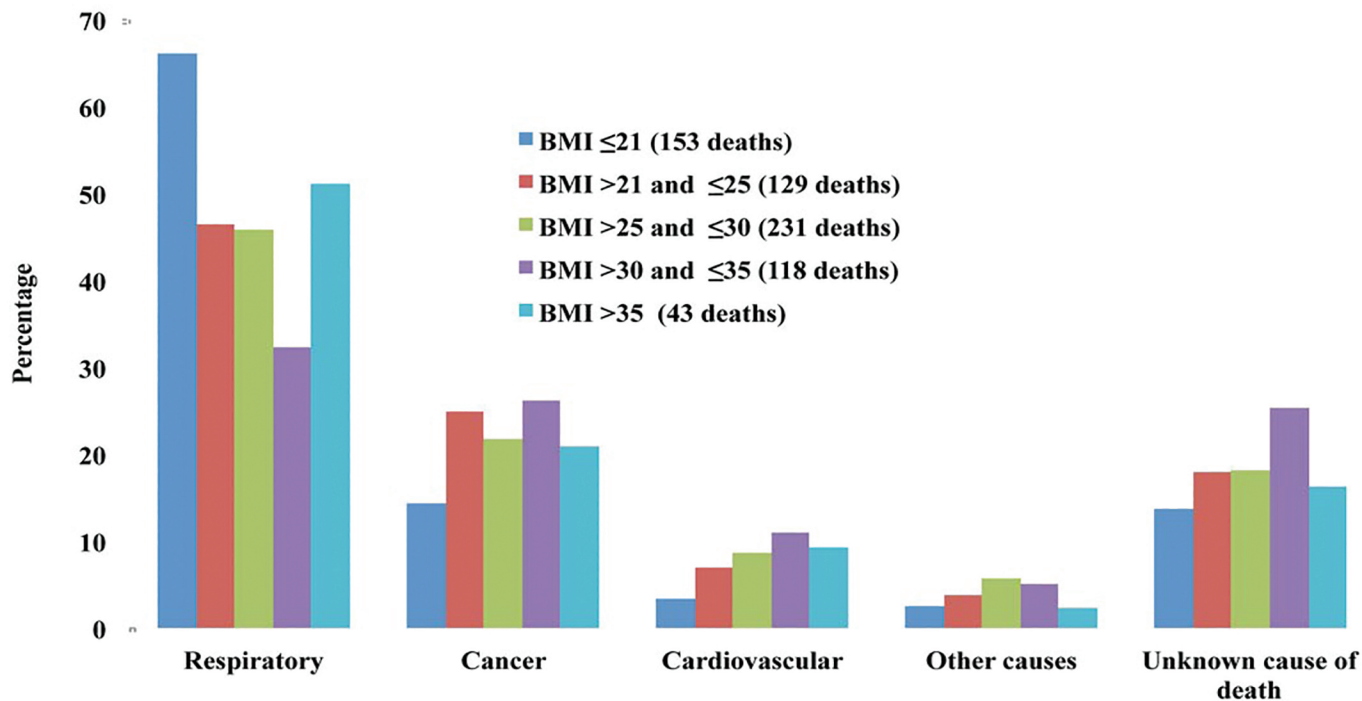

e-Table 1. Comorbidities with &gt;5% Prevalence: Distribution by BMI Category.

|                                   | BMI ≤21 | 21<BMI<25 | 25≤BMI<30 | 30≥BMI<35 | BMI ≥35 | P-value |
|-----------------------------------|---------|-----------|-----------|-----------|---------|---------|
| HTN                               | 41%     | 46%       | 53%       | 59%       | 68%     | <.001*  |
| Hyperlipidemia                    | 23%     | 38%       | 48%       | 49%       | 54%     | <.0001* |
| DM                                | 8%      | 13%       | 21%       | 32%       | 43%     | <.0001* |
| Diabetes Mellitus with Neuropathy | 2%      | 2%        | 3%        | 6%        | 11%     | <.0001* |
| OSA                               | 2%      | 2%        | 7%        | 15%       | 39%     | <.0001  |
| Degenerative Joint Disease        | 23%     | 23%       | 31%       | 28%       | 42%     | <.0001* |
| CHF                               | 13%     | 13%       | 14%       | 18%       | 24%     | <.0001* |
| CRF                               | 9%      | 12%       | 17%       | 23%       | 29%     | <.0001* |
| Erectile Dysfunction              | 8%      | 6%        | 11%       | 10%       | 21%     | <.0001* |
| Pulmonary HTN                     | 11%     | 7%        | 9%        | 10%       | 19%     | 0.0014* |
| Gout                              | 2%      | 3%        | 4%        | 4%        | 12%     | <.0001* |
| Venous Insufficiency              | 3%      | 2%        | 4%        | 5%        | 9%      | 0.0052* |
| AAA                               | 12%     | 7%        | 6%        | 4%        | 3%      | 0.0016* |
| Substance Abuse                   | 24%     | 14%       | 12%       | 11%       | 12%     | <.0001* |
| Osteoporosis                      | 15%     | 10%       | 9%        | 4%        | 4%      | <.0001* |
| Peripheral Arterial Diseases      | 17%     | 20%       | 17%       | 15%       | 10%     | 0.0108* |
| Prostate Cancer                   | 8%      | 9%        | 10%       | 5%        | 6%      | 0.0277* |
| Anxiety                           | 16%     | 13%       | 10%       | 11%       | 12%     | 0.11    |
| CVA                               | 12%     | 12%       | 12%       | 7%        | 11%     | 0.12    |
| Hypothyroidism                    | 5%      | 9%        | 6%        | 6%        | 10%     | 0.125   |
| Lung Cancer                       | 11%     | 8%        | 10%       | 9%        | 7%      | 0.19    |
| GERD                              | 16%     | 19%       | 20%       | 16%       | 13%     | 0.34    |
| CAD                               | 30%     | 31%       | 29%       | 30%       | 38%     | 0.49    |
| Gallbladder Disease               | 3%      | 6%        | 5%        | 4%        | 6%      | 0.54    |
| DVT                               | 7%      | 4%        | 6%        | 4%        | 5%      | 0.37    |
| Pulmonary Fibrosis                | 7%      | 5%        | 7%        | 5%        | 6%      | 0.66    |
| Atrial Flutter/Fibrillation       | 17%     | 11%       | 13%       | 12%       | 19%     | 0.85    |
| Gastric/Duodenal Ulcer            | 13%     | 11%       | 11%       | 9%        | 16%     | 0.9     |
| Depression                        | 19%     | 15%       | 16%       | 16%       | 22%     | 0.98    |
| BPH                               | 29%     | 26%       | 27%       | 25%       | 31%     | 0.99    |
| Cataract                          | 3%      | 5%        | 6%        | 6%        | 7%      | 0.1     |

Abbreviations:

AAA= Abdominal Aortic Aneurism, BPH= Benign Prostatic Hypertrophy, CAD = Coronary Artery Disease, CHF=Congestive Heart Failure, CRF=Chronic Renal Failure, CVA=Cerebro-Vascular Accident, DM= Diabetes Mellitus, DVT= Deep Venous Thrombosis, GERD= Gastro-Esophageal Reflux Disease, HTN= Systemic Hypertension, OSA= Obstructive Sleep Apnea, PAD: peripheral artery disease, Pulmonary HTN= Pulmonary Hypertension .
